1 **Reducing shade avoidance can improve Arabidopsis canopy performance against**  
2 **competitors**

3

4 Chrysoula K. Pantazopoulou<sup>1</sup>, Franca J. Bongers<sup>1,2</sup> and Ronald Pierik<sup>1</sup>

5 <sup>1</sup> *Plant Ecophysiology, Dept. of Biology, Utrecht University, The Netherlands*

6 <sup>2</sup> *State Key Laboratory of Vegetation and Environmental Change, Institute of Botany, Chinese*  
7 *Academy of Sciences, Beijing, China*

8 **Correspondence: c.pantazopoulou@uu.nl and r.pierik@uu.nl**

9

10 **Abstract**

11

12 The loss of crop yield due to weeds is an urgent agricultural problem. Although  
13 herbicides are an effective way to control weeds, more sustainable solutions for weed  
14 management are desirable. It has been proposed that crop plants can communally  
15 suppress weeds by shading them out. Shade avoidance responses, such as upward leaf  
16 movement (hyponasty) and stem or petiole elongation, enhance light capture of  
17 individual plants, increasing their individual fitness. The shading capacity of the entire  
18 crop community might, however, be more effective if aspects of shade avoidance are  
19 suppressed. Testing this hypothesis in crops is hampered by the lack of well-  
20 characterized mutants. We therefore investigated if *Arabidopsis* competitive  
21 performance at the community level against invading competitors is affected by the  
22 ability to display shade avoidance. We tested two mutants: *pif4pif5* that has mildly  
23 reduced petiole elongation and hyponasty and *pif7* with normal elongation but absent  
24 hyponasty in response to shade. Although *pif4pif5* performed similar to wildtype, we  
25 found that *pif7* showed significantly increased canopy biomass and suppression of  
26 invading competitors as compared to its wildtype. Our data thus show that modifying  
27 specific shade avoidance aspects has potential for plant community performance. This  
28 may help to suppress weeds in crop stands.

29

30

31

32

33 **Highlight**

34 Hyponastic response in canopies facilitates light penetration and weed growth.  
35 Inhibition of this response to neighbors increased canopy biomass, canopy closure and  
36 suppression of competitors.

37

38 **Key words**

39 Shade avoidance, canopy architecture, planting pattern, competition, *Arabidopsis*  
40 *thaliana*, hyponasty

41

42

43 **Introduction**

44 Competition from weeds accounts for substantial yield losses in global crop  
45 production systems (Bridges, 1994; Liebman *et al.*, 2001; Oerke 2006). Weed control  
46 is usually accomplished by the extensive use of herbicides, and although these can be  
47 effective, they are costly and have negative side effects on people's health and the  
48 environment (Buhler, 2002; Chauhan and Johnson, 2010). There is, therefore, an  
49 urgent need for novel methods to suppress weeds in a cost-effective and sustainable  
50 manner.

51 Light is the core energy source for all plants, and when grown at high planting  
52 densities, individual plants consolidate light capture by growing away from the shade  
53 cast by neighboring plants, a process called shade avoidance (de Wit *et al.*, 2016a).  
54 Proximate plants are detected through the red (R) : far-red (FR) light ratio (R:FR) in the  
55 light reflected between plants, a ratio that decreases because of selective absorption  
56 of R light for photosynthesis and reflection of FR light. When weeds emerge in a crop  
57 vegetation, FR reflection becomes more intense due to the presence of more plant  
58 biomass, leading to strong reduction of R:FR (Pierik and Testerink, 2014). Several  
59 studies have shown that under low R:FR conditions, crops develop phenotypes such  
60 as inhibition of lateral branching (tillering) in wheat (Ugarte *et al.*, 2010), formation of  
61 smaller tubers and longer stem in potato (Boccalandro *et al.*, 2003) and increased stem  
62 elongation in maize (Dubois *et al.*, 2010). All these morphological changes have a  
63 negative impact on crop productivity (Robson *et al.*, 1996; Boccalandro *et al.*, 2003).

64 One approach to improve crop yield and suppress weeds, is by optimizing the shading  
65 capacity of the entire crop community, for example by optimizing planting patterns  
66 and plant phenotypic responses to density. In Evolutionary Agroecology (a.k.a.  
67 Darwinian Agriculture) it is proposed that shade avoidance responses that enhance  
68 individual plant performance, actually reduce performance of the entire community  
69 of crop plants (Weiner *et al.*, 2010).

70 Studies on cereal crops have shown that optimization of cropping pattern and density  
71 based on the community, rather than the individual performance, led to a more  
72 effective weed suppression and increased crop productivity (Weiner *et al.*, 2001;  
73 Olsen *et al.*, 2005, 2006; Kristensen *et al.*, 2008). This has for example been shown to  
74 increase wheat yield by up to 30% (Weiner *et al.*, 2001). This major improvement may  
75 be explained by the fact that crop plants growing in uniform patterns can collectively  
76 create a stronger shade over the weeds than those sown in for example row planting  
77 patterns. In other words, crop plants can collectively suppress weeds much better  
78 than individual plants would be capable of. Since shade avoidance responses have a  
79 major impact on the 3D architecture of the plant, they strongly impact the shading  
80 capacity of a uniform plant community. Here, we will investigate to what extent  
81 modulation of shade avoidance responses at high planting density can improve  
82 shading capacity, competitor (weed) suppression and canopy plant performance.

83 Shade avoidance responses are typically elicited upon detection of a reduced R:FR  
84 ratio, and are further promoted by depletion of blue light when the canopy closes (  
85 (Ballaré, 1999; de Wit *et al.*, 2016b). Shade avoidance responses include upward leaf  
86 movement (hyponasty), elongation of stems and petioles and inhibition of branching  
87 (Franklin, 2008; Pierik and de Wit, 2013; de Wit *et al.*, 2016b). These responses help  
88 plants reposition their leaves away from the shade and into the light. Shade avoidance  
89 responses have been observed in most crop species and also in a variety of wild  
90 species, including the genetic model plant *Arabidopsis thaliana* (Ballaré, 1999;  
91 Franklin, 2008; Martínez-García *et al.*, 2010; Casal, 2012; Gommers *et al.*, 2013).

92 In responses to low R:FR, phytochrome photoreceptors are inactivated (Ballaré, 1999;  
93 Franklin *et al.*, 2003; Kozuka *et al.*, 2010) and this relieves their repression of  
94 Phytochrome Interacting Factors (PIFs) (Li *et al.*, 2012; Jeong and Choi, 2013; Leivar  
95 and Monte, 2014), a class of transcription factors that promote the expression of

96 growth promoting genes (Oh *et al.*, 2012; Zhang *et al.*, 2013). PIF4, PIF5 and PIF7 are  
97 the dominant PIF proteins involved in shade avoidance in *Arabidopsis* (Lorrain *et al.*,  
98 2008; Koini *et al.*, 2009; Hornitschek *et al.*, 2012; Li *et al.*, 2012; Pantazopoulou *et al.*,  
99 2017).

100 Shade avoidance responses in crops are often associated with reduced yield, because  
101 resource investments are rerouted from harvestable organs towards stem elongation  
102 (Robson *et al.*, 1996; Boccalandro *et al.*, 2003; Carriedo *et al.*, 2016). These responses  
103 furthermore create a more open canopy architecture, which allows more light  
104 penetration that in turn facilitates weed growth.

105 Here, we will investigate if canopy planting patterns and modifications of shade  
106 avoidance responses can indeed optimize canopy architecture to suppress  
107 competitors by improved shading capacity. We will compare *Arabidopsis thaliana*  
108 wildtype with well-described mutants for aspects of the shade avoidance syndrome;  
109 an opportunity that does not (yet) exist in other plant species. We show that the *pif7*  
110 mutant that lacks a hyponastic response, but has preserved petiole elongation  
111 responses to neighbors, performs significantly better at high density, uniform planting  
112 patterns, than does its corresponding wildtype. Modest inhibition of both elongation  
113 and hyponasty in the *pif4pif5* double mutant on the other hand did not affect plant  
114 performance. Consistent with our hypothesis, a canopy of *pif7* plants was better able  
115 to suppress competing invaders than was a shade avoiding wildtype canopy.

116 Our data indicate that modifying plant canopy architecture through altered shade  
117 avoidance characteristics provides great opportunity to control weed proliferation in  
118 cropping systems in a sustainable way.

119

120

## 121 **Materials and methods**

122

### 123 **Canopy conditions and measurements**

124 Genotypes used in this study, as canopy plants were wild-type Col-0, *pif4-101 pif5-1*  
125 (Lorrain *et al.*, 2008) and *pif7* (Leivar *et al.*, 2008) while *pif4-101 pif5-1 pif7-1* (de Wit  
126 *et al.*, 2015) was used as the invading competitor. Canopy seeds were sown in a pot  
127 with a surface area of 10.5x10.5 cm filled with a substrate of soil:perlite (2:1), with

128 additional nutrients [6 g of slow release fertilizer (Osmocote ‘plus mini’ Ammonium  
129 Nitrate Based Fertilizer; UN2071; Scotts Europe BV, Heerlen, The Netherlands) and 6  
130 g MgOCaO (17%; Vitasol BV, Stolwijk, The Netherlands)]. The *pif4pif5pif7* plants were  
131 sown in a different pot three days after canopy plants for germination. Sowing was  
132 followed by stratification for four days (dark, 4°C). After stratification plants were  
133 moved to a short-day growth chamber (9 h/15 h of light/dark period respectively; R:FR  
134 was 2.3 and PAR = 150  $\mu\text{mol m}^{-2} \text{s}^{-1}$ ). When canopy plots were 15 days old (seeds of  
135 the canopy were sown directly in plots), competitor *pif4pif5pif7* seedlings (12 days  
136 old) were transplanted into the plot (Fig. S1). The canopy plots were grown for another  
137 29 days and subsequently harvested. Measurements were performed on four plants  
138 for each plot. Petiole and lamina length of the three longest leaves from each plant  
139 were measured with a digital caliper. Individual plant leaf area was scanned and  
140 determined with image-J software. Shoot dry weight was recorded with a digital scale,  
141 after drying the tissue at 70°C oven for three days. Plot biomass and LAI were  
142 calculated from the four individuals by extrapolating to the full plot and density. The  
143 heights of the canopies were measured with a ruler while the canopy cover was  
144 determined from top photographs using the Plant CV software (Gehan *et al.*, 2017). In  
145 the canopy cover measurements by the PlantCV, we exclude the outer plants of the  
146 canopy to avoid edge effects. The height and the canopy cover measurements were  
147 taken every five days, starting from the day 20 of canopy growth. Seed output was  
148 recorded in separate experiments with the same growth conditions, three months  
149 after sowing. Every 10 days (starting from the sowing day) plants were watered with  
150 nutrients, on all other days they were watered with tap water. When the first silique  
151 from each pot turned brown, watering was stopped. The number of siliques was  
152 measured, after two weeks of ripening. Petiole angles (hyponasty) (Fig.3 and Fig.4)  
153 and lamina length (Fig. S5) of the fifth-youngest leaf were measured digitally with  
154 image J. Pictures were taken every day for 13 days, starting at day 28 (t=0).

155

#### 156 **R:FR measurements**

157 The R:FR measurements started at day 20 (before the competition starts, (de Wit *et*  
158 *al.*, 2012)) by using the Spectrosense2-Skye light sensor with a glass fiber extension  
159 with 0.6 cm light collection area. The sensor was placed inside of the canopy plot (Fig.

160 S1A) and measured the R:FR from four different directions and on four different  
161 positions, resulting in 16 measurements per time/per pot. When canopy closure  
162 occurred, the sensor was placed under the canopy, without causing any damage to  
163 the plants or interfering with the canopy shade. The measurements were always taken  
164 from the same position in all densities and patterns.

165

### 166 **Experimental design of the densities and patterns with or with the competitor** 167 ***pif4pif5pif7***

168 For the Col-0 canopy plants three different densities were used (16 plants per pot  
169 (1111 plants m<sup>-2</sup>), 25 plants per pot (2500 plants m<sup>-2</sup>), 64 plants per pot (8264 plants  
170 m<sup>-2</sup>); hereafter low, medium and high density respectively) and two spatial patterns  
171 [uniform (equal distance between the plants) and row (bigger distance between the  
172 rows of the plants but smaller distance between the plants within the rows), See Fig.  
173 S1B)]. In uniform pattern, the distance between the plants was 3 cm, 2 cm and 1 cm  
174 in low, medium and high density respectively. In row pattern, the distance between  
175 the rows was always 5 cm while within the rows the distance between the plants were  
176 0.6 cm, 1.25 cm and 2 cm in high medium and low density respectively. For the  
177 canopies consisting of *pif4pif5* and *pif7* plants only high density-uniform pattern was  
178 used. The number of competitor *pif4pif5pif7* plants and their positions which were  
179 transplanted into the high density-uniform pattern plots were the same in all the  
180 canopies [16 plants per pot (1111 plants m<sup>-2</sup>)] (Fig. S1C).

181

### 182 **Light experiments**

183 Individual plant responses to R:FR were studied for the different genotypes used here.  
184 To reduce the R:FR light ratios in the control white (W) light conditions from Philips  
185 HPI lamps (R:FR = 2.3, 160 μmol m<sup>-2</sup> s<sup>-1</sup> PAR), supplemental far-red LEDs (Philips Green  
186 Power FR 730 nm) were used. FR supplementation resulted in R:FR = 0.2 (160 μmol m<sup>-2</sup>  
187 s<sup>-1</sup> PAR). To mimic the true canopy shade, green filter (Lee filters Fern Green) was  
188 used (resulting in R:FR = 0.35 and 35 μmol m<sup>-2</sup> s<sup>-1</sup> PAR). The light spectra of the  
189 treatments were measured with an Ocean optics JAZ spectroradiometer (Fig. S2).

190

### 191 **FSP model**

192 A functional-structural plant (FSP) model (Vos *et al.*, 2009) of Arabidopsis rosettes,  
193 previously used and described in (Bongers *et al.*, 2017, 2019; Pantazopoulou *et al.*,  
194 2017), was used to simulate Arabidopsis plant types, using the simulation platform  
195 GroIMP and its radiation model (<https://sourceforge.net/projects/groimp/>).  
196 Arabidopsis rosettes were represented by a collection of leaves (represented by a  
197 petiole and lamina) whose appearance rate and shape were based on empirical data  
198 (Bongers *et al.*, 2017). The leaves individually grew in time in 3D based on light  
199 interception, photosynthesis and plant-wide carbon allocation principles (for detailed  
200 explanations of the principles see Evers, 2016; Bongers *et al.*, 2017). In addition, leaves  
201 showed petiole elongation and hyponastic responses based on the virtual touching of  
202 leaves and the perception of R:FR (Bongers *et al.*, 2017). Therefore, individual growth  
203 and shade avoidance responses depended on the capture of light (represented by PAR  
204 intensity) and the perception of R:FR within the simulated canopy.

205 The light source emitted PAR representing  $220 \mu\text{mol m}^{-2} \text{s}^{-1}$  and a R:FR ratio of  
206 2.3, which corresponded to the growth chamber experiments. 100 plants were placed  
207 in a uniform grid of  $10 \times 10$  with an inter-plant distance of 1 cm, of which only the  
208 middle 16 plants were used for analyses. Plants grew for 44 days based on the PAR  
209 captured, photosynthesis rates and carbon allocation patterns (Evers, 2016; Bongers  
210 *et al.*, 2017). Each model time step, which represented 24 hours, hyponastic responses  
211 could occur if leaves touched or if R:FR perception at the lamina tip was below 0.5  
212 (Bongers *et al.*, 2017; Pantazopoulou *et al.*, 2017). The strength of the hyponastic  
213 responses depended per model scenario; plants could increase their leaf angle with 0,  
214 0.2, 1, 5, 10, 15 or 20 degrees per day. The angle of the leaves over time was therefore  
215 a function of the number of times in which touch and/or low R:FR perception occurred  
216 per individual leaf, with a maximum leaf angle of 80 degrees. The intensity of PAR that  
217 reached the soil was captured by 64 virtual soil-tiles (each  $0.25 \text{ cm}^2$ ) underneath the  
218 16 middle plants.

219

## 220 **Statistics**

221 Data were analyzed by one or two-way ANOVA followed by LSD test. All the analyses  
222 were performed with GraphPad.

223

## 224 **Results**

### 225 **The effect of planting density and pattern on Col-0 performance**

226 To investigate the effect of sowing pattern and density on *Arabidopsis thaliana*  
227 (hereafter Col-0) performance, we grew canopy plots in three different densities (low,  
228 medium and high) and two different patterns (uniform and row) (Fig. 1A). The R:FR  
229 showed a reduction in all densities and patterns through time, reflecting the growing  
230 canopy (Fig. 1B). However, the strongest and most rapid decline of R:FR was observed  
231 in high density/uniform pattern, where the R:FR was decreased from approximately  
232 2.0 to 1.1 after eight days of measurements hinting at a rapidly closing canopy (Fig.  
233 1A). This was not the case for the row pattern in high density, where the R:FR was still  
234 high, presumably because the inter row distance was higher than in the uniform  
235 pattern. Low and medium density showed reduction of R:FR (less than 1.5) at day 36  
236 (Fig. 1B), indicating that the canopy remained more open for a longer period of time.  
237 The leaf area index (LAI) expresses the amount of leaf area per unit soil area and  
238 reflects the closure status of the canopy. LAI increased more strongly in the uniform  
239 than in the row pattern and mostly in the medium and high densities (Fig. 1C).  
240 Interestingly, leaf lamina length decreased with increasing plant density, irrespective  
241 of the planting pattern (Fig. S3A). The opposite was observed for petiole length, where  
242 the high density induced the strongest elongation (Fig. S3B). Enhanced petiole  
243 elongation, combined with reduced lamina size, are classic aspects of shade  
244 avoidance.

245 Furthermore, there was a strong and significant effect of the density and planting  
246 pattern on Col-0 biomass. The row pattern produced Col-0 plants with the smallest  
247 dry weight, indicating that the intraspecific competition was higher in rows compared  
248 to the uniform pattern. In terms of planting density, the total biomass of the plot in  
249 high density and uniform pattern was higher than the other densities (medium, low)  
250 than the row pattern (Fig. 1D).

251 The number of siliques per square meter for the different density and planting  
252 patterns was consistent with biomass (Fig. 1E), which suggests that the uniform-  
253 planting pattern at the high density would result in the highest yield per unit area.

254

### 255 **Steering canopy light penetration through variations in hyponasty**



256 Using a previously published 3D computational Arabidopsis model (Bongers *et al.*,  
257 2017), we determined the percentage of light penetration in the canopy through time  
258 and under control of different degrees of hyponasty. Seven different hyponastic  
259 scenarios were simulated; from 0 degrees up to 20 degrees hyponastic growth (Fig. 2).  
260 The simulations show that canopies, consisting of plants with minimal hyponastic  
261 response to neighbors (e.g. 0, 0.2, 1 and 5 degrees) create strong reduction of light  
262 penetration inside the canopy; after 28 days, less than 5 % of the light reaches the  
263 soil. On the other hand, scenarios with faster hyponasty allowed for less light  
264 extinction and thus higher penetration of light inside the canopy. These simulations  
265 support the notion that upward leaf movement responses to neighbors may facilitate  
266 light penetration through the canopy, which can be beneficial for weed growth.

267 To test experimentally if altered hyponastic growth can regulate canopy  
268 closure and light penetration, we selected previously published mutants with altered  
269 shade avoidance characteristics. The *pif7*, *pif4pif5* double and *pif4pif5pif7* triple  
270 knockouts have reduced hyponastic responses to shade cues in short-term  
271 experiments (Pantazopoulou *et al.*, 2017) and we verified their responses to  
272 prolonged shade cue conditions. Reduction in R:FR resulted in the elevation of Col-0  
273 petiole angle (hyponasty) during the first two days (day 29 and 30), while petiole  
274 elongation was promoted from day 28 until 34 (Fig. 3A-D). *pif7* had a similar petiole  
275 elongation response as did Col-0 in all the treatments but its hyponastic response to  
276 low R:FR was entirely absent, whereas its response to green shade (reproducing  
277 canopy shade) was severely reduced (Fig. 3A & 3B). *pif4pif5* showed a phenotype  
278 initially similar to wild-type both in terms of petiole angle and elongation, but the  
279 petiole elongated slightly less through time in low R:FR. On the other hand,  
280 *pif4pif5pif7* was unresponsive to low R:FR for both traits (Figure 3C & 3D). Green filter  
281 triggered a continuous shade avoidance phenotype in Col-0 (hyponasty and petiole  
282 elongation) from day 28 up to 36 (8 days) (Figure 3B & 3D). Hyponastic responses were  
283 reduced in *pif4pif5* and not observed at all in *pif7* and *pif4pif5pif7* under these severe  
284 shade conditions (Fig. 3A & 3C). In general, Col-0 shade avoidance responses  
285 (hyponasty & petiole elongation) were stronger in green shade than in low R:FR alone.  
286 Overall, *pif4pif5* was less responsive than Col-0, whereas *pif4pif5pif7* was fully

287 insensitive to the different light conditions. Interestingly, *pif7* showed similar petiole  
288 growth as Col-0 and a similarly absent hyponastic response as in *pif4pif5pif7*.

289 The impact of different magnitudes of hyponastic responses in canopy closure,  
290 was tested by growing canopies of Col-0, *pif7* and *pif4pif5*. We decided not to use the  
291 *pif4pif5pif7* triple mutant as a canopy plant, but as an invading competitor in  
292 establishing canopies. High density, uniform planting patterns were used, since these  
293 closed their canopies most effectively (Fig. 1). Here, we monitored the canopy closure  
294 state through time by using the imaging analysis PlantCV (Fig. 4). Data showed that  
295 *pif7* canopies developed a better soil cover than Col-0 and *pif4pif5* early in the canopy  
296 development (day 20 until 25). The *pif4pif5* canopies remained more open than *pif7*  
297 canopies for another five days but percentage of the covered soil area was not  
298 significantly different from Col-0 canopies at day 30. At later stages all canopies had  
299 developed nearly full closure without. The *pif4pif5* canopies display reduced petiole  
300 elongation compared to *pif7* and Col-0 (Fig. 3D), resulting in a relatively low canopy  
301 height for this double mutant (Fig. S4B). The height of *pif7* canopies was also reduced  
302 as compared to Col-0 (Fig. S4B), presumably because of the reduced upward leaf  
303 movement in this mutant (Fig. 3A)

304

### 305 **Performance of canopy and competitor plants during competition**

306 To test the impact of separate shade avoidance traits on competitor suppression and  
307 canopy performance, we used as canopy plants the strong shade avoider Col-0, the  
308 mild reduction of shade avoidance genotype *pif4pif5*, and *pif7* which does not show  
309 hyponasty but does induce petiole elongation upon low R:FR (Fig. 3). As an invading  
310 competitor we used *pif4pif5pif7*, which was planted between the canopy plants. To  
311 estimate shade avoidance responses of the different genotypes in true canopies,  
312 rather than independent light treatments, we measured petiole and lamina length at  
313 the end of the canopy development. *pif7* canopy plants displayed the largest lamina  
314 compared to Col-0 and *pif4pif5* canopy plants during competition. Petiole length was  
315 enhanced upon competition in Col-0 and *pif7* but not in *pif4pif5* canopy plants (Fig.  
316 S6). The strong lamina and petiole elongation but not hyponasty (fig. 3 and fig S4B)  
317 responses of *pif7* during competition could have resulted in the higher biomass and  
318 LAI compared to the other two genotypes (Fig. 5). This also had a strong effect on

319 *pif4pif5pif7* competitor performance. The faster closed canopy and plant growth of  
320 *pif7* during competition was associated with a reduction in growth of *pif4pif5pif7*  
321 competitors (Fig. 6A & 6B). On the other hand, the improved light exposure of  
322 *pif4pif5pif7* competitor plants under the rapidly closed canopy of *pif4pif5* was  
323 associated with enhanced biomass and leaf area (L.A.) of the competitor triple mutant  
324 compared to the other genotypes (Fig. 5, 6A & 6B). Indeed, the *pif4pif5pif7* competitor  
325 hardly survives under the *pif7* canopy while the percentage of survival between Col-0  
326 and *pif4pif5* was similar (Fig. 6C).

327

328

### 329 **Discussion**

330 The adaptability of to changing environments and their competitive potential makes  
331 them a major threat for agricultural yields when they interact with crop plants (Oerke,  
332 2006). Studies in the past decades found that crop sowing uniformity in high density  
333 can positively affect yield and suppress weeds (Weiner *et al.*, 2001; Olsen *et al.*, 2006;  
334 Kristensen *et al.*, 2008). A second way to improve crop yield and suppress weeds,  
335 according to the principles of Evolutionary Agroecology would be by controlling the  
336 shade avoidance properties of the crops in a way that would minimize light  
337 penetration through the canopy down to the soil where weeds sprout (Weiner *et al.*,  
338 2010). Since only very few well-defined shade avoidance mutants exist in crops  
339 (Carriedo *et al.*, 2016; Kebrom and Mullet, 2016; Weiner *et al.*, 2017), we tested the  
340 impact of shade avoidance modulation on canopy performance and weed suppression  
341 in the model species *Arabidopsis thaliana*.

342 Although petiole elongation, combined with upward leaf movement (hyponasty), will  
343 increase access to light at the individual plant level (Ballaré and Pierik, 2017;  
344 Pantazopoulou *et al.*, 2017), the reduced leaf lamina growth that typically occurs in  
345 shade avoiding *Arabidopsis* (de Wit *et al.*, 2015) may counterbalance the predicted  
346 gain in photosynthesis of individual plants (Fritz *et al.*, 2018). Part of the shade  
347 avoidance responses will have been triggered through the drop in R:FR inside the  
348 canopies (Fig. 1B). However, shade avoidance responses, and especially hyponasty,  
349 can on their turn also affect the R:FR inside the canopy by affecting the extent to which  
350 a vertical canopy structure is formed in this otherwise horizontally growing rosette

351 species (de Wit *et al.*, 2012). Modulating shade avoidance traits in different canopy  
352 structures may thus affect light distribution inside these canopies. Indeed, using a 3D  
353 *Arabidopsis* plant model (Bongers *et al.*, 2017), we found that slow-down of  
354 hyponastic growth upon shade detection in all canopy plants can clearly reduce light  
355 penetration through the canopy down to soil level (Fig. 2). To test the consequences  
356 of this scenario experimentally and also monitor the effect that these canopies can  
357 have on competitor performance we used *Arabidopsis* mutants that had similar  
358 hyponastic responses variations as used in the 3D plant model. As a competitor, we  
359 used the *pif4 pif5 pif7* triple mutant, which remained unresponsive in terms of  
360 hyponasty and petiole elongation under the long-term shade conditions. The  
361 *pif4pif5pif7* would not be able to outgrow the canopy plants, allowing us to 1) mimic  
362 the crop-weed competition where crops (like cereals) typically have a size advantage  
363 and 2) record the effect of different canopy architectures (i.e. *pif7* and *pif4pif5*) on  
364 competitor performance. The canopy architecture of *pif7* had a strong negative impact  
365 on the performance of competitor *pif4pif5pif7* and a positive impact on its own canopy  
366 biomass (fig. 5A). Under these conditions, the *pif4pif5pif7* competitor biomass and  
367 survival rate were significantly lower than under Col-0 and *pif4pif5* canopy  
368 architectures (Fig. 6A & 6C). We propose that the much faster closing of the *pif7*  
369 canopy together with the larger LAI as compared to the Col-0 and *pif4pif5* canopies  
370 (Fig. 4, S4 & fig. 5B), resulted in less light availability for the competitor, leading to  
371 reduced performance of the competitor.

372 Interestingly, despite the fact that the *pif4pif5* canopy architecture showed mild  
373 reduction of shade avoidance responses, the competitor *pif4pif5pif7* performed  
374 similar in Col-0 and *pif4pif5* canopy. We speculate that the advantage of modestly  
375 reduced shade avoidance in *pif4pif5* for communal competitor suppression might be  
376 outweighed by its reduced overall growth rate, which still leads to a relatively open  
377 canopy.

378 As mentioned above, *pif4pif5pif7* lacks any shade avoidance response to plant density,  
379 signaled by low R:FR and green filter (fig. 3). This allowed us to study if the resident  
380 canopy architecture can be optimized such that growth in the understory can be  
381 inhibited by shading the invading competitors. Future studies could be designed to  
382 include competitors that can show shade avoidance responses and thus have the

383 capacity to compete stronger against the dominant canopy. It would be possible then  
384 that the invading competitors could even escape from the shade-casting canopy  
385 altogether and enhance their individual fitness at the expense of the collective fitness  
386 of the dominant canopy. If good mutants come available for upright-growing, stem-  
387 forming plants, these could be used to test scenario's of a more vertically layered  
388 canopy, representing many of the staple crops world-wide, for weed-suppression.  
389 Our data show that losing one of the shade avoidance responses in Arabidopsis  
390 canopy, hyponasty, has potential to suppress competitors. Translating this to crop-  
391 weed competition scenario's depends on the architecture of the crop plant but could  
392 potentially improve weed suppression and reduce yield losses due to weeds.

393

394

395 Author contributions: C.K.P. and R.P. designed research; C.K.P. and F.J.B. performed  
396 research; C.K.P. and F.J.B analyzed data; and C.K.P. and R.P. wrote the paper.

397 The authors declare no conflict of interest.

398

### 399 **Acknowledgments**

400 We thank Tom Rankenberg for instructions on using PlantCV, Maxime Brugman for  
401 help with preliminary experiments and the Plant Ecophysiology group for help during  
402 harvests. This work was funded by Netherlands Organization for Scientific Research  
403 Vidi Grant 86512.003 (to R.P.).

404

405

406

407

408

409

410

411

412

413

414

415

416 **References**

- 417 **Ballaré CL.** 1999. Keeping up with the neighbours: phytochrome sensing and other  
418 signalling mechanisms. *Trends in plant science* **4**, 97–102.
- 419 **Ballaré CL, Pierik R.** 2017. The shade-avoidance syndrome: multiple signals and  
420 ecological consequences. *Plant, cell & environment*.
- 421 **Ballaré CL, Scopel AL, Sánchez RA.** 1990. Far-red radiation reflected from Adjacent  
422 Leaves: An Early Signal of Competition in Plant Canopies. *Science* **247**, 329–332.
- 423 **Boccalandro HE, Ploschuk EL, Yanovsky MJ, Sánchez RA, Gatz C, Casal JJ.** 2003.  
424 Increased phytochrome B alleviates density effects on tuber yield of field potato  
425 crops. *Plant Physiology* **133**, 1539–1546.
- 426 **Bongers FJ, Douma JC, Iwasa Y, Pierik R, Evers JB, Anten NPR.** 2019. Variation in  
427 plastic responses to light results from selection in different competitive  
428 environments—A game theoretical approach using virtual plants. *PLoS*  
429 *computational biology* **15**, e1007253.
- 430 **Bongers FJ, Pierik R, Anten NPR, Evers JB.** 2017. Subtle variation in shade avoidance  
431 responses may have profound consequences for plant competitiveness. *Annals of*  
432 *botany*, in press.
- 433 **Bridges DC.** 1994. Impact of weeds on human endeavors. *Weed Technology* **8**, 392–  
434 395.
- 435 **Buhler DD.** 2002. 50th Anniversary—Invited Article: Challenges and opportunities for  
436 integrated weed management. *Weed Science* **50**, 273–280.
- 437 **Bullock D, Khan S, Rayburn A.** 1998. Soybean yield response to narrow rows is  
438 largely due to enhanced early growth. *Crop Science* **38**, 1011–1016.
- 439 **Carriedo LG, Maloof JN, Brady SM.** 2016. Molecular control of crop shade  
440 avoidance. *Current opinion in plant biology* **30**, 151–158.
- 441 **Casal JJ.** 2012. Shade avoidance. *The Arabidopsis book / American Society of Plant*  
442 *Biologists* **10**, e0157.
- 443 **Chauhan BS, Johnson DE.** 2010. Implications of narrow crop row spacing and  
444 delayed *Echinochloa colona* and *Echinochloa crus-galli* emergence for weed growth  
445 and crop yield loss in aerobic rice. *Field Crops Research* **117**, 177–182.
- 446 **Dubois PG, Olsefski GT, Flint-Garcia S, Setter TL, Hoekenga OA, Brutnell TP.** 2010.  
447 Physiological and genetic characterization of end-of-day far-red light response in  
448 maize seedlings. *Plant physiology* **154**, 173–186.
- 449 **Evers JB.** 2016. Simulating Crop Growth and Development Using Functional-  
450 Structural Plant Modeling. *Canopy Photosynthesis: From Basics to Applications*. 219–  
451 236.
- 452 **Franklin KA.** 2008. Shade avoidance. *New Phytologist* **179**, 930–944.
- 453 **Franklin KA, Davis SJ, Stoddart WM, Vierstra RD, Whitelam GC.** 2003. Mutant  
454 analyses define multiple roles for phytochrome C in *Arabidopsis*  
455 photomorphogenesis. *The Plant Cell* **15**, 1981–1989.
- 456 **Fritz MA, Rosa S, Sicard A.** 2018. Mechanisms Underlying the Environmentally  
457 Induced Plasticity of Leaf Morphology. *Frontiers in genetics* **9**.
- 458 **Gehan MA, Fahlgren N, Abbasi A, Berry JC, Callen ST, Chavez L, Doust AN, Feldman**  
459 **MJ, Gilbert KB, Hodge JG.** 2017. PlantCV v2: Image analysis software for high-  
460 throughput plant phenotyping. *PeerJ* **5**, e4088.
- 461 **Gommers CMM, Visser EJW, St Onge KR, Voeselek LACJ, Pierik R.** 2013. Shade  
462 tolerance: when growing tall is not an option. *Trends in Plant Science* **18**, 65–71.

- 463 **Hornitschek P, Kohnen M V., Lorrain S, et al.** 2012. Phytochrome interacting factors  
464 4 and 5 control seedling growth in changing light conditions by directly controlling  
465 auxin signaling. *Plant Journal* **71**, 699–711.
- 466 **Jeong J, Choi G.** 2013. Phytochrome-interacting factors have both shared and distinct  
467 biological roles. *Molecules and cells* **35**, 371–380.
- 468 **Kebrom TH, Mullet JE.** 2016. Transcriptome profiling of tiller buds provides new  
469 insights into PhyB regulation of tillering and indeterminate growth in sorghum. *Plant*  
470 *physiology* **170**, 2232–2250.
- 471 **Koini MA, Alvey L, Allen T, Tilley CA, Harberd NP, Whitelam GC, Franklin KA.** 2009.  
472 High temperature-mediated adaptations in plant architecture require the bHLH  
473 transcription factor PIF4. *Current Biology* **19**, 408–413.
- 474 **Kozuka T, Kobayashi J, Horiguchi G, Demura T, Sakakibara H, Tsukaya H, Nagatani**  
475 **A.** 2010. Involvement of auxin and brassinosteroid in the regulation of petiole  
476 elongation under the shade. *Plant Physiology* **153**, 1608–1618.
- 477 **Kristensen L, Olsen J, Weiner J.** 2008. Crop density, sowing pattern, and nitrogen  
478 fertilization effects on weed suppression and yield in spring wheat. *Weed Science* **56**,  
479 97–102.
- 480 **Leivar P, Monte E.** 2014. PIFs: systems integrators in plant development. *The Plant*  
481 *Cell* **26**, 56–78.
- 482 **Leivar P, Monte E, Al-Sady B, Carle C, Storer A, Alonso JM, Ecker JR, Quail PH.** 2008.  
483 The Arabidopsis phytochrome-interacting factor PIF7, together with PIF3 and PIF4,  
484 regulates responses to prolonged red light by modulating phyB levels. *Plant Cell* **20**,  
485 337–352.
- 486 **Leivar P, Quail PH.** 2011. PIFs: pivotal components in a cellular signaling hub. *Trends*  
487 *in plant science* **16**, 19–28.
- 488 **Li L, Ljung K, Breton G, Schmitz RJ, Pruneda-Paz J, Cowing-Zitron C, Cole BJ, Ivans LJ,**  
489 **Pedmale U V, Jung H-S.** 2012. Linking photoreceptor excitation to changes in plant  
490 architecture. *Genes & development* **26**, 785–790.
- 491 **Liebman M, Mohler CL, Staver CP.** 2001. *Ecological management of agricultural*  
492 *weeds*. Cambridge University Press.
- 493 **Lorrain S, Allen T, Duek PD, Whitelam GC, Fankhauser C.** 2008. Phytochrome-  
494 mediated inhibition of shade avoidance involves degradation of growth-promoting  
495 bHLH transcription factors. *Plant Journal* **53**, 312–323.
- 496 **Martínez-García JF, Galstyan A, Salla-Martret M, Cifuentes-Esquivel N, Gallemí M,**  
497 **Bou-Torrent J.** 2010. Regulatory Components of Shade Avoidance Syndrome.  
498 *Advances in Botanical Research*.65–116.
- 499 **Norris RF, Elmore CL, Rejmánek M, Akey WC.** 2001. Spatial arrangement, density,  
500 and competition between barnyardgrass and tomato: I. Crop growth and yield. *Weed*  
501 *Science* **49**, 61–68.
- 502 **Oerke E-C.** 2006. Crop losses to pests. *The Journal of Agricultural Science* **144**, 31.
- 503 **Oh E, Zhu J-Y, Wang Z-Y.** 2012. Interaction between BZR1 and PIF4 integrates  
504 brassinosteroid and environmental responses. *Nature Cell Biology* **14**, 802.
- 505 **Olsen J, Kristensen L, Weiner J.** 2006. Influence of sowing density and spatial pattern  
506 of spring wheat (*Triticum aestivum*) on the suppression of different weed species.  
507 *Weed Biology and Management* **6**, 165–173.
- 508 **Olsen J, Kristensen L, Weiner J, Griepentrog H-W.** 2005. Increased density and  
509 spatial uniformity increase weed suppression by spring wheat. *Weed Research* **45**,

- 510 316–321.
- 511 **Pantazopoulou CK, Bongers FJ, Küpers JJ, Reinen E, Das D.** 2017. Neighbor detection  
512 at the leaf tip adaptively regulates upward leaf movement through spatial auxin  
513 dynamics. **114**.
- 514 **Pierik R, Testerink C.** 2014. The art of being flexible: how to escape from shade, salt,  
515 and drought. *Plant Physiology* **166**, 5–22.
- 516 **Pierik R, de Wit M.** 2013. Shade avoidance: phytochrome signalling and other  
517 aboveground neighbour detection cues. *Journal of Experimental Botany* **65**, 2815–  
518 2824.
- 519 **Robson PRH, McCormac AC, Irvine AS, Smith H.** 1996. Genetic engineering of  
520 harvest index in tobacco through overexpression of a phytochrome gene. *Nature*  
521 *biotechnology* **14**, 995–998.
- 522 **Ross MA, Lembi CA.** 1999. Herbicide incorporation techniques and equipment.  
523 *Applied Weed Science*. 2nd ed. Upper Saddle River, NJ: Prentice-Hall, 371–375.
- 524 **Schmitt J, Dudley SA, Pigliucci M.** 1999. Manipulative approaches to testing adaptive  
525 plasticity: phytochrome-mediated shade-avoidance responses in plants. *the*  
526 *american naturalist* **154**, S43–S54.
- 527 **Thornley JHM, Johnson IR.** 1990. A mathematical approach to plant and crop  
528 physiology. *A mathematical approach to plant and crop physiology*.
- 529 **Ugarte CC, Trupkin SA, Ghiglione H, Slafer G, Casal JJ.** 2010. Low red/far-red ratios  
530 delay spike and stem growth in wheat. *Journal of experimental botany* **61**, 3151–  
531 3162.
- 532 **Vos J, Evers JB, Buck-Sorlin GH, Andrieu B, Chelle M, De Visser PHB.** 2009.  
533 Functional–structural plant modelling: a new versatile tool in crop science. *Journal of*  
534 *experimental Botany* **61**, 2101–2115.
- 535 **Weiner J, Andersen SB, Wille WK, Griepentrog HW, Olsen JM.** 2010. Evolutionary  
536 Agroecology: the potential for cooperative, high density, weed-suppressing cereals.  
537 *Evolutionary Applications* **3**, 473–479.
- 538 **Weiner J, Du Y, Zhang C, Qin X, Li F.** 2017. Evolutionary agroecology: individual  
539 fitness and population yield in wheat (*Triticum aestivum*). *Ecology* **98**, 2261–2266.
- 540 **Weiner J, Griepentrog H, Kristensen L.** 2001. Suppression of weeds by spring wheat  
541 *Triticumaestivum* increases with crop density and spatial uniformity. *Journal of*  
542 *Applied Ecology* **38**, 784–790.
- 543 **de Wit M, Galvão VC, Fankhauser C.** 2016*a*. Light-mediated hormonal regulation of  
544 plant growth and development. *Annual review of plant biology* **67**, 513–537.
- 545 **de Wit M, Kegge W, Evers JB, Vergeer-van Eijk MH, Gankema P, Voesenek LACJ,**  
546 **Pierik R.** 2012. Plant neighbor detection through touching leaf tips precedes  
547 phytochrome signals. *Proceedings of the National Academy of Sciences* **109**, 14705–  
548 14710.
- 549 **de Wit M, Keuskamp DH, Bongers FJ, Hornitschek P, Gommers CMM, Reinen E,**  
550 **Martínez-Cerón C, Fankhauser C, Pierik R.** 2016*b*. Integration of phytochrome and  
551 cryptochrome signals determines plant growth during competition for light. *Current*  
552 *Biology* **26**, 3320–3326.
- 553 **de Wit M, Ljung K, Fankhauser C.** 2015. Contrasting growth responses in lamina and  
554 petiole during neighbor detection depend on differential auxin responsiveness rather  
555 than different auxin levels. *New Phytologist* **208**, 198–209.
- 556 **Zhang Y, Mayba O, Pfeiffer A, Shi H, Tepperman JM, Speed TP, Quail PH.** 2013. A



557 quartet of PIF bHLH factors provides a transcriptionally centered signaling hub that  
558 regulates seedling morphogenesis through differential expression-patterning of  
559 shared target genes in Arabidopsis. PLoS genetics **9**, e1003244.  
560  
561

562  
563

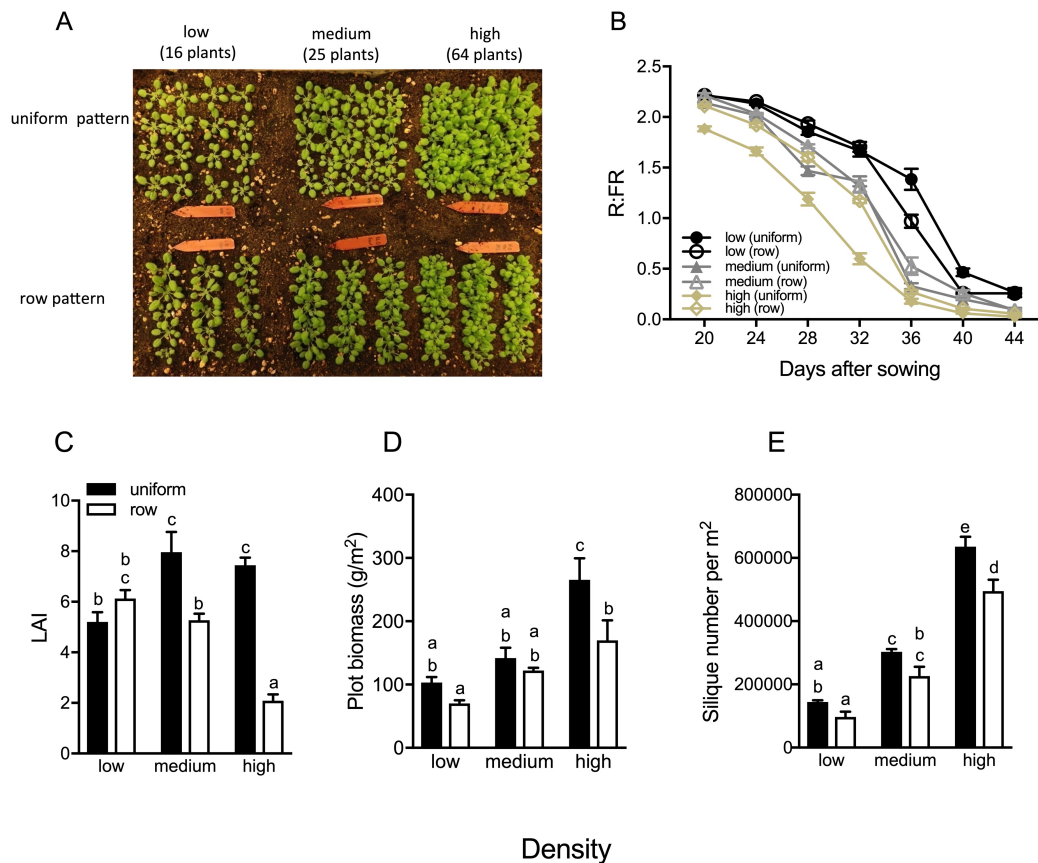

564

565 Fig. 1: Arabidopsis Col-0 in high density, uniform pattern produces more biomass and  
 566 canopy cover than at lower densities and row patterns. (A) In the upper row Col-0  
 567 plants grow in a uniform pattern (uniform), while in the lower row plants grow in row  
 568 pattern (row) at three different densities (low, medium, high). (B) The R:FR light ratio  
 569 measured inside Col-0 canopies, during the days of growth, in low (black lines),  
 570 medium (grey lines) and high (yellow lines) densities and two patterns (uniform and  
 571 row). (C-E) Leaf area index (LAI; C), plot biomass per m<sup>2</sup> (D) and seed output (silique  
 572 number per m<sup>2</sup> pot; E) at three different densities (low, medium, high) and two  
 573 different planting patterns (uniform, row). Data represent mean  $\pm$  SE (n=5). Different  
 574 letters indicate statistically significant differences (two-way ANOVA with LSD test,  $P < 0.05$ ).

575

576

577

578

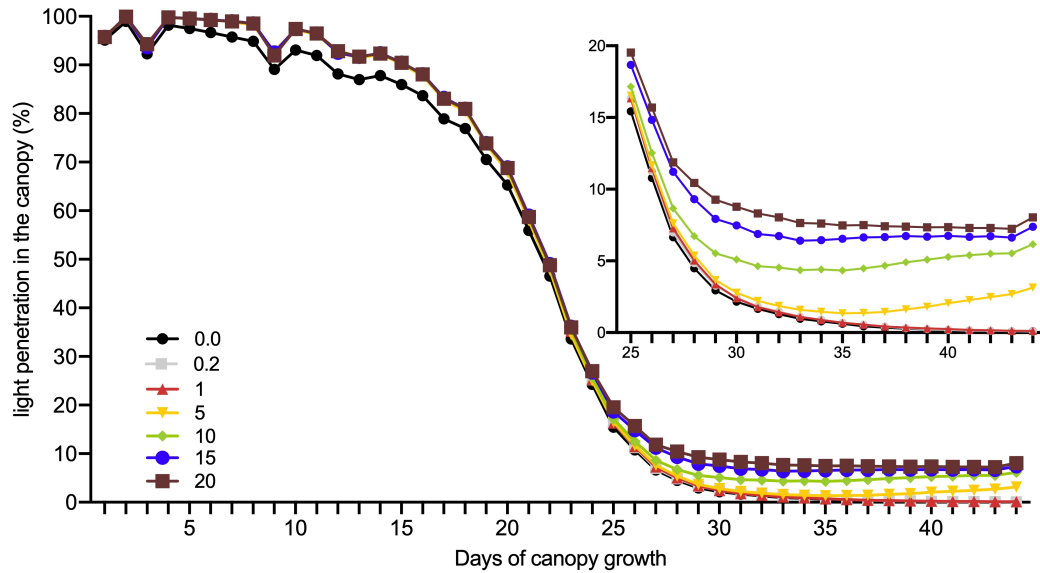

579

580 Fig. 2: Reduced hyponastic responses result in lower percentage of light penetrating

581 the canopy and reaching the soil. Percentage of light reaching the soil is simulated

582 with a 3D Arabidopsis computational model. Various canopy growth simulation

583 scenarios consist of plants with different degrees of hyponastic responses to

584 proximate neighbor plants, ranging from 0 to 20 degrees per day (see legend). Data

585 represent mean  $\pm$  SD (n=10).

586

587

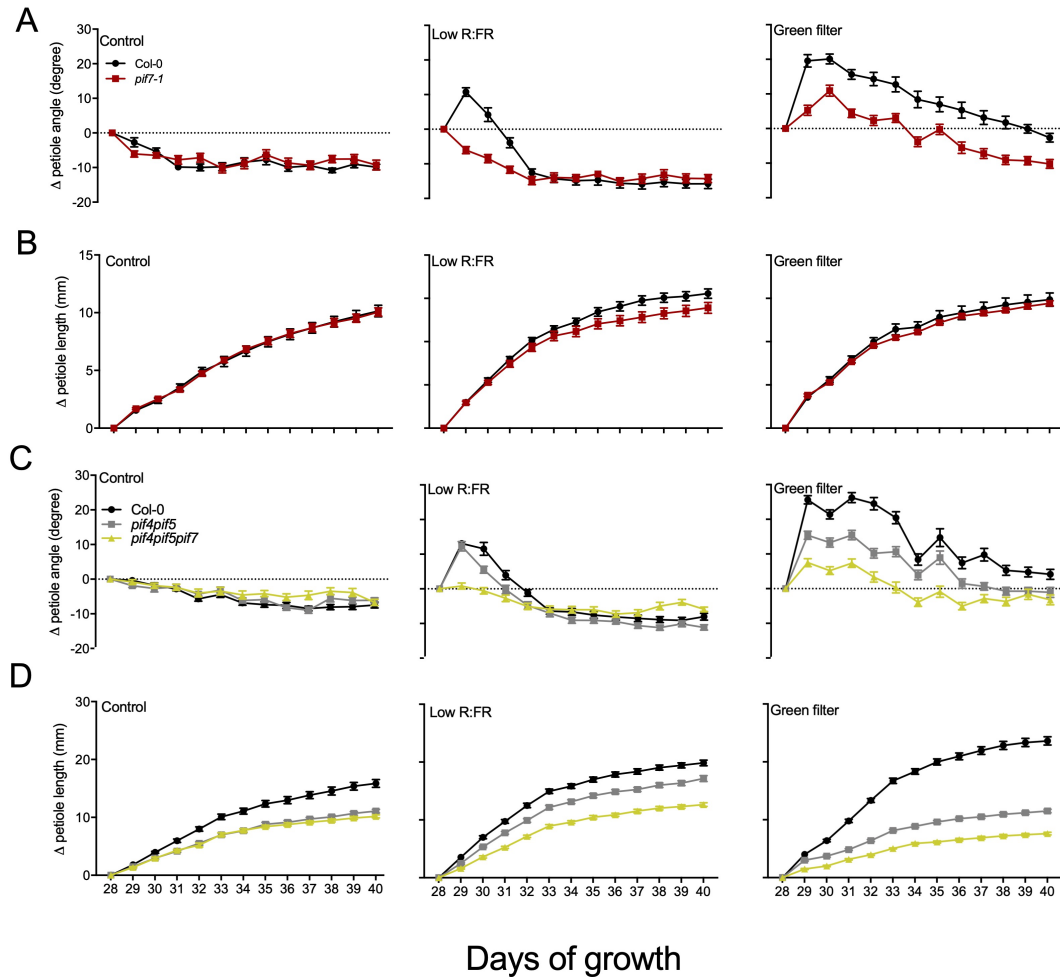

588

589

590 Fig. 3: Shade avoidance responses (change in petiole length (A, C) and change in  
591 petiole angle (B, D)) of Col-0, *pif7*, *pif4pif5* and *pif4pif5pif7* upon white light (control),  
592 low R:FR and green filter exposure. Light treatments lasted 13 days and started when  
593 plants were 28 days old. Data represent mean  $\pm$  SE (n=15).

594

595

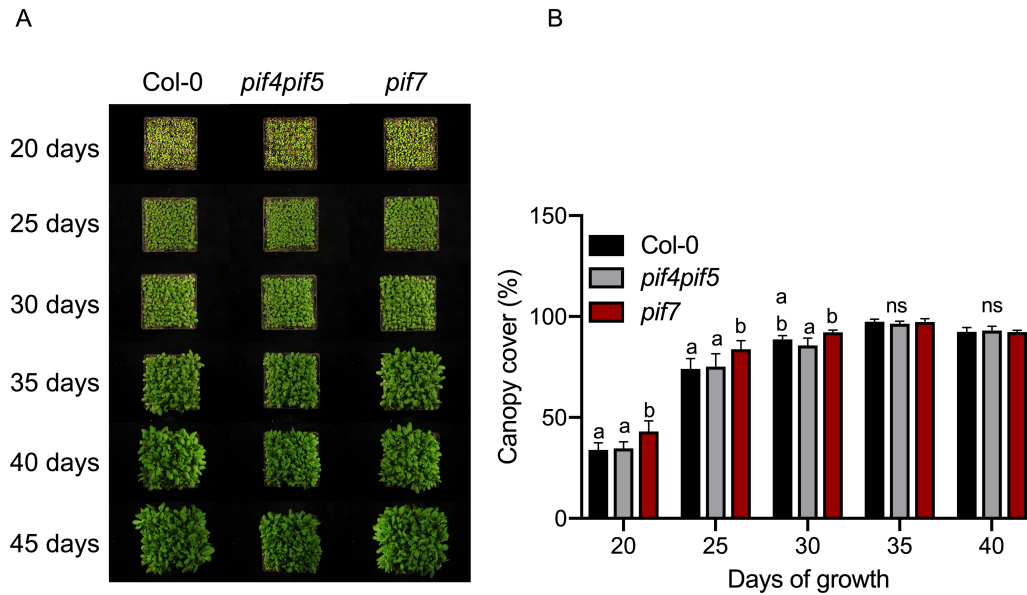

596  
597 Fig. 4: The *pif7* mutant creates a faster closed canopy than Col-0 and *pif4pif5*. (A)  
598 Pictures illustrate how the canopies of Col-0 (left), *pif4pif5* (middle) and *pif7* (right)  
599 plants develop and close soil exposure to light. (B) The percentage of soil covered by  
600 the same canopies: Col-0 (black bars), *pif4pif5* (grey bars) and *pif7* (red bars),  
601 through time. The Col-0, *pif4pif5* and *pif7* canopies plants grew at high density,  
602 uniform pattern. Data represent mean  $\pm$  SE (n=5). Different letters indicate statistically  
603 significant differences (two-way ANOVA with LSD test,  $P < 0.05$ . ns=not significant).

604  
605  
606  
607  
608  
609

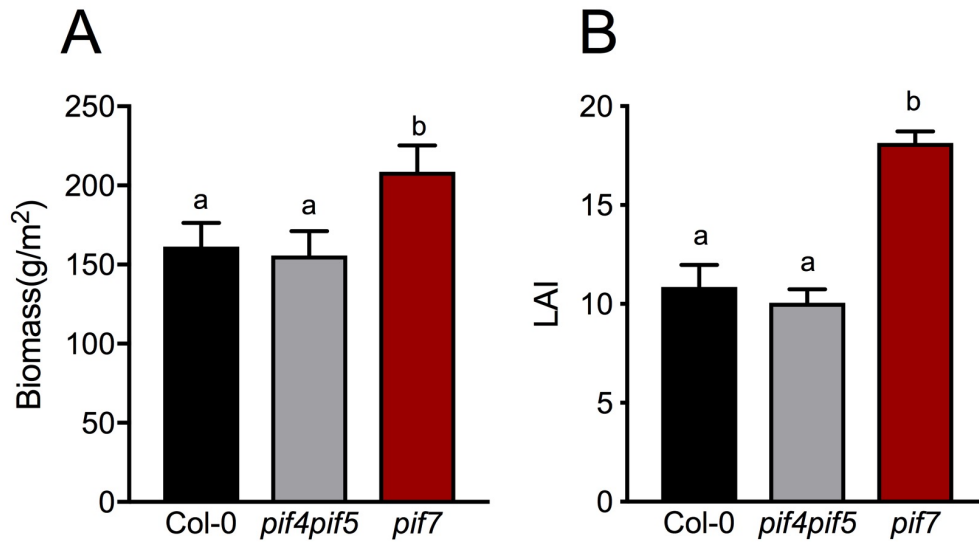

610  
611 Fig. 5: The *pif7* canopies grew larger than Col-0 and *pif4pif5* under high-density  
612 competing conditions. (A) Biomass and (B) LAI of canopies consisting of Col-0 (black  
613 bar), *pif4pif5* (grey bars) or *pif7* (red bars), growing at high density, uniform pattern,  
614 measured after 44 days of growth. Data represent mean  $\pm$  SE (n=5). Different letters  
615 indicate statistically significant differences (two-way ANOVA with LSD test,  $P < 0.05$ ).

616

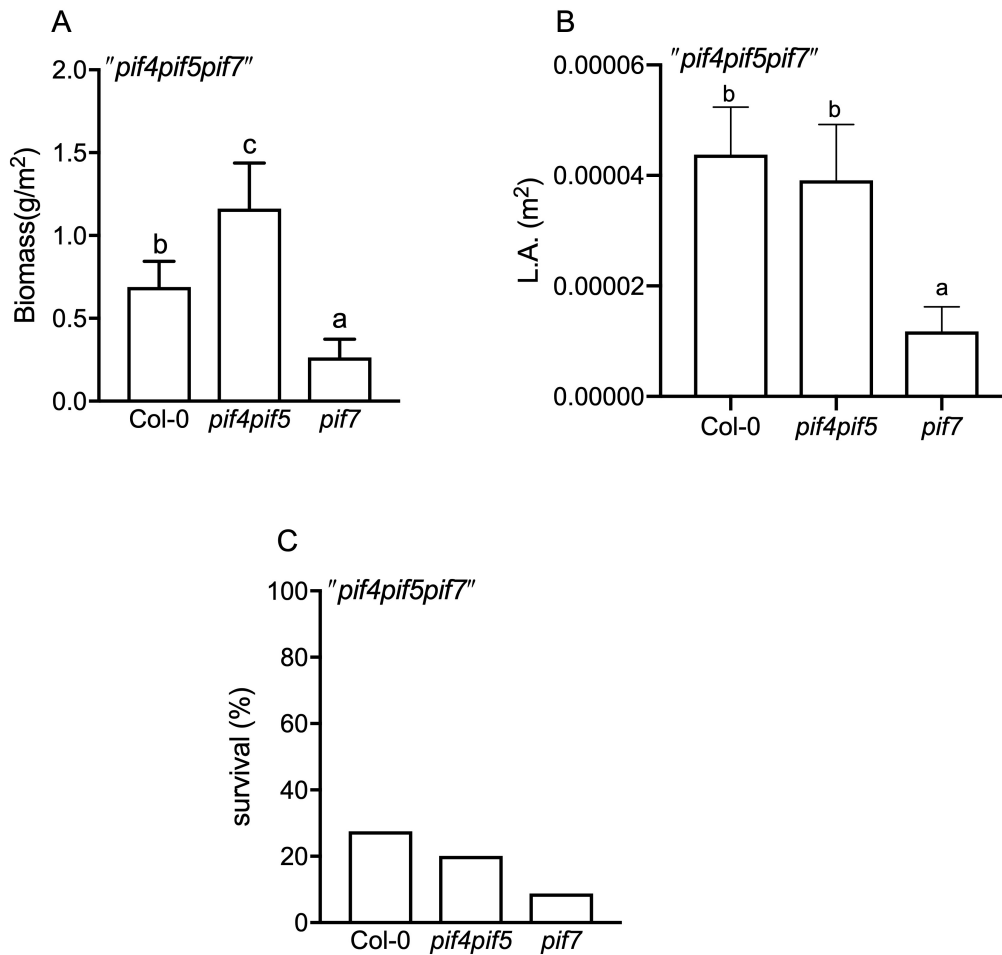

617

618 Fig. 6: The *pif7* canopies suppressed the competitor *pif4pif5pif7* more effectively than

619 did Col-0 and *pif4pif5* canopies. The competitor's (A) biomass, (B) leaf area and (C)

620 percentage of survival, under the canopies of Col-0, *pif4pif5* and *pif7* for 44 days. The

621 plants grew at high density, uniform pattern. Data represent mean  $\pm$  SE (n=5). Different

622 letters indicate statistically significant differences (two-way ANOVA with LSD test,  $P < 0.05$ ).

623
